# Supplementary material for: Double-helix PnLin chains: novel potential nonlinear optical materials
Source: Royal Society of Chemistry journal article supplement (doi:10.1039/c8cp01116h), 2018-01-01

Table S1 Average static first hyperpolarizability ( $\beta'_{\text{tot}}$ ) and their corresponding x, y, and z components ( $\beta'_x$ ,  $\beta'_y$ , and  $\beta'_z$ ) of the double-helix  $P_n\text{Li}_n$  ( $n = 6-12$ ) chains at LC-BLYP/6-31+G(d) theoretical level.

|                        | $\beta'_x$ (au) | $\beta'_y$ (au) | $\beta'_z$ (au) | $\beta'_{\text{tot}}$ (au) |
|------------------------|-----------------|-----------------|-----------------|----------------------------|
| $P_6\text{Li}_6$       | -1869.28        | -133.03         | 14.25           | 1874.06                    |
| $P_7\text{Li}_7$       | 3514.16         | 669.43          | 232.73          | 3584.92                    |
| $P_8\text{Li}_8$       | -7228.12        | -1063.58        | 92.06           | 7306.53                    |
| $P_9\text{Li}_9$       | -11768.75       | 392.82          | 920.65          | 11811.24                   |
| $P_{10}\text{Li}_{10}$ | 19145.78        | -119.48         | 401.22          | 19150.36                   |
| $P_{11}\text{Li}_{11}$ | -29090.80       | -256.14         | 357.21          | 29094.13                   |
| $P_{12}\text{Li}_{12}$ | 40251.61        | 614.96          | -724.41         | 40262.83                   |

Fig S1 HOMO and LUMO distributions of the double-helix  $P_n\text{Li}_n$  ( $n = 6-12$ ) chains.

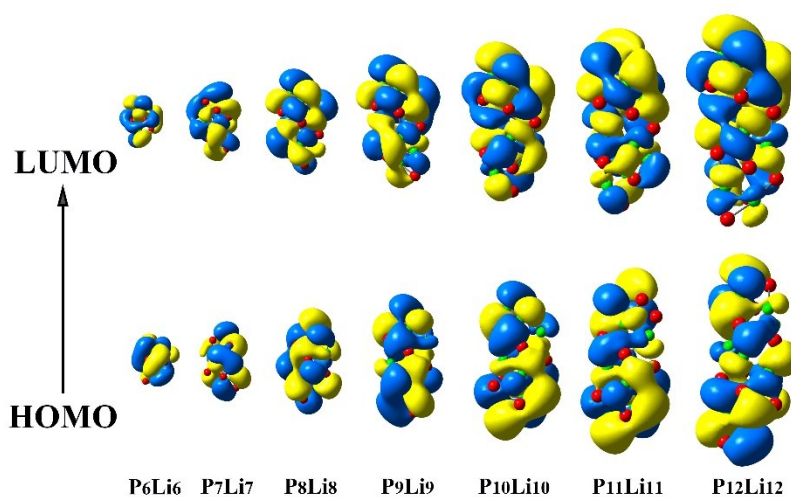

Supplement: c8cp01116h1.pdf [file c8cp01116h1.pdf]
